# Supplementary material for: Vitamin D confers neuroprotective effects in traumatic brain injury by activating Nrf2 signaling through an autophagy-mediated mechanism
Source: Research Square preprint supplement (doi:10.21203/rs.3.rs-362065/v1), 2021-03-26
Supplement: Supplementary file 1 [file b081d9b2ac90b7e58c063bb2.docx]

**Supplementary Table1.** Neurological Severity Scores (NSS)

|  | **Score** |
| --- | --- |
| **Raising rat by tail(normal=0; maximum=3)** | **（3）** |
| Flexion of forelimb | 1 |
| Flexion of hindlimb | 1 |
| Head moved >10° to vertical axis within 30s | 1 |
| **Placing rat on floor** **(normal=0; maximum=3)** | **（3）** |
| Normal walk | 0 |
| Inability to walk straight | 1 |
| Circling toward paretic side | 2 |
| Falls down to paretic side | 3 |
| **Sensory tests(normal=0; maximum=2)** | **（2）** |
| Placing test (visual and tactile test) | 1 |
| Proprioceptive test (deep sensation) | 1 |
| **Beam balance tests** **(normal=0; maximum=6)** | **（6）** |
| Balances with steady posture | 0 |
| Grasps side of beam | 1 |
| Hugs beam and 1 limb falls down from beam | 2 |
| Hugs beam and 2 limbs fall down from beam, or spins on beam (>60s) | 3 |
| Attempts to balance on beam but falls off (>40s) | 4 |
| Attempts to balance on beam but falls off (>20s) | 5 |
| Falls off; no attempt to balance or hang on to beam (<20s) | 6 |
| **Reflex absence and abnormal movements** | **（4）** |
| Pinna reflex (head shake when auditory meatus is touched) | 1 |
| Corneal reflex (eye blink when cornea is lightly touched with cotton) | 1 |
| Startle reflex (motor response to a brief noise) | 1 |
| Seizures, myoclonus, myodystony | 1 |
| **Maximum points** | **（18）** |
